# Supplementary material
Source: HighWire-hosted journal article supplement (https://www.cmaj.ca/highwire/filestream/58360/field_highwire_adjunct_files/1/recombinant-lin-2-at.pdf)

**Appendix 2:** Forest plots of summary estimates of outcomes (total blood loss, red blood cell transfusion and number of patients receiving transfusions) from randomized controlled trials of the off-label prophylactic use of recombinant factor VIIa (rFVIIa) in patients without hemophilia

**Total blood loss, mL**

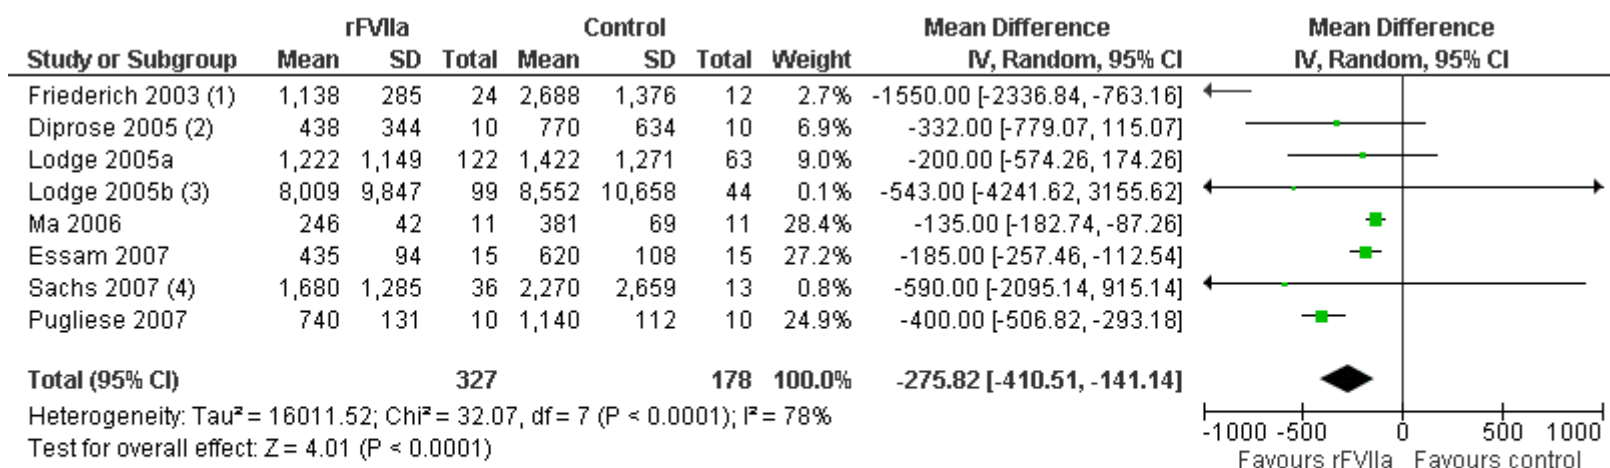

- (1) Friederich 2003 = Data converted from median/IQR provided in the publication
- (2) Diprose 2005 = Additional data obtained from author
- (3) Lodge 2005b = Additional data obtained from author
- (4) Sachs 2007 = Unadjusted analysis used as data provided as mean/SD. Adjusted analysis favoured rFVIIa group.

## Red blood cell transfusion, mL

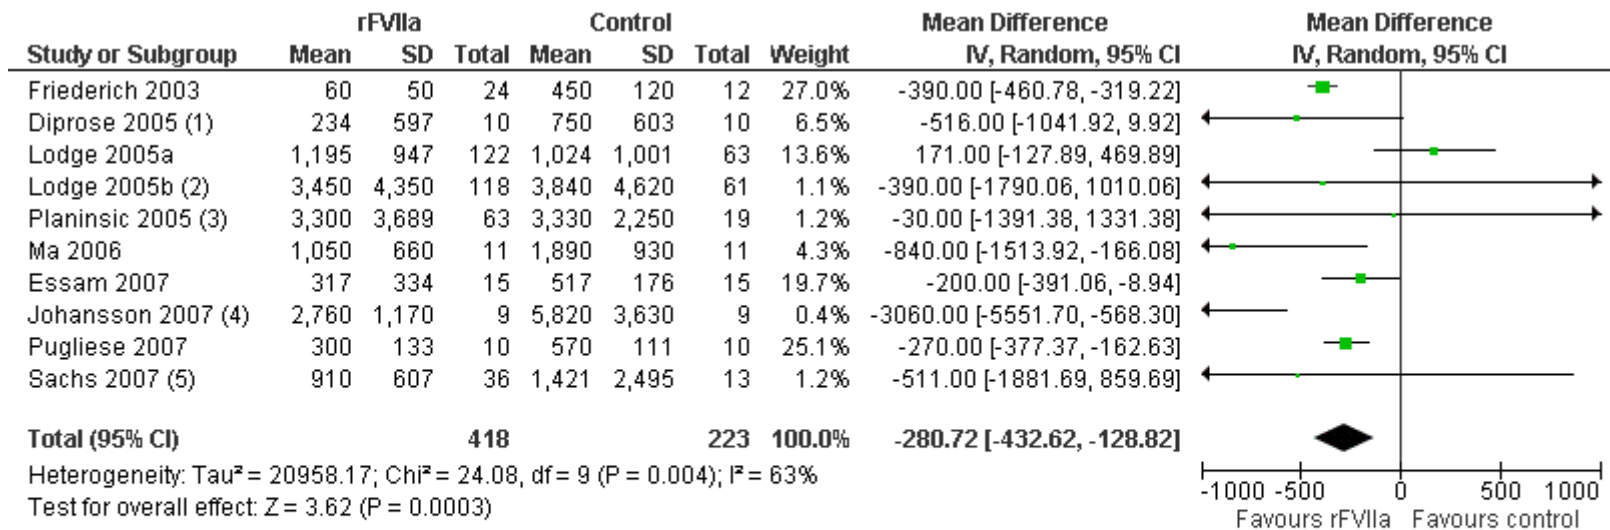

- (1) Diprose 2005 = Additional data obtained from author  
 (2) Lodge 2005b = Additional data obtained from author  
 (3) Planinsic 2002 = Data converted from median/IQR provided in the publication  
 (4) Johansson 2007 = Additional data obtained from author  
 (5) Sachs 2007 = Unadjusted analysis used as data provided as mean/SD. Adjusted analysis favoured rFVIIa group.

## Number of patients receiving transfusions

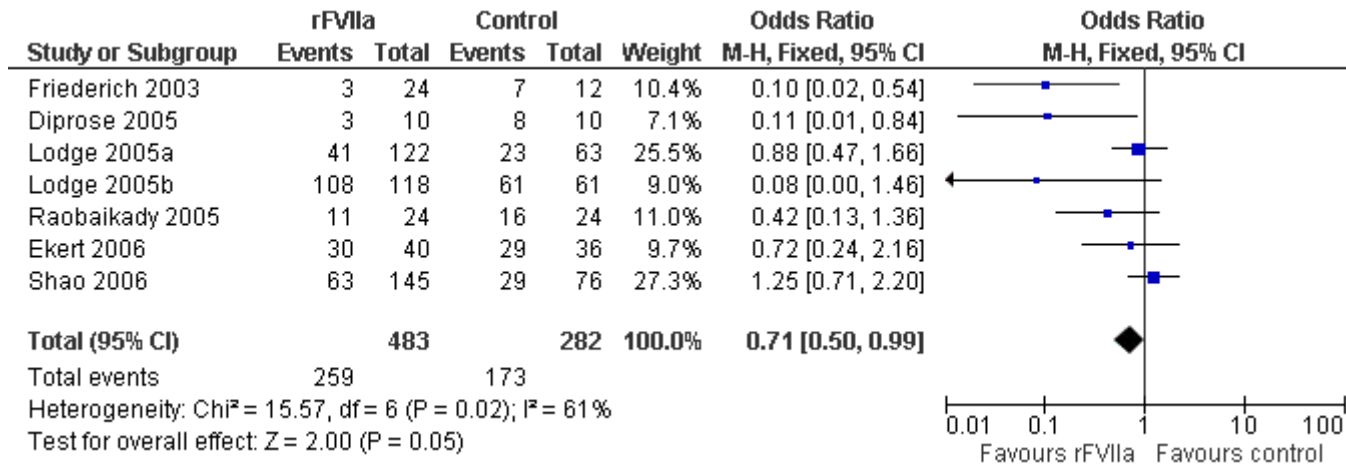

Supplement: recombinant-lin-2-at.pdf [file recombinant-lin-2-at.pdf]
